# Supplementary material
Source: PubMed Central journal article supplement (PMC8946667)
Supplement: ciab586_suppl_supplementary_materials.pdf [file ciab586_suppl_supplementary_materials.pdf]

## Supplementary Material

### Predictors of cell-associated HIV-1 DNA over one year in very early treated infants

Louise Kuhn,<sup>1,2</sup> Maria Paximadis,<sup>3</sup> Bianca Da Costa Dias,<sup>3</sup> Yanhan Shen,<sup>1</sup> Sizanani Mncube,<sup>3</sup> Renate Strehlau,<sup>4</sup> Stephanie Shiau,<sup>5</sup> Faezah Patel,<sup>4,6</sup> Megan Burke,<sup>4</sup> Karl-Günter Technau,<sup>4</sup> Gayle Sherman,<sup>3,4</sup> Shayne Loubser,<sup>3</sup> Elaine J. Abrams,<sup>7,8</sup> and Caroline T. Tiemessen,<sup>3</sup> for the LEOPARD study team

<sup>1</sup>Gertrude H. Sergievsky Center, Vagelos College of Physicians and Surgeons, Columbia University Irving Medical Center, New York, NY, USA.

<sup>2</sup>Department of Epidemiology, Mailman School of Public Health, Columbia University Irving Medical Center, New York, NY, USA.

<sup>3</sup>Centre for HIV and STIs, National Institute for Communicable Diseases, National Health Laboratory Services, and Faculty of Health Sciences, University of the Witwatersrand, Johannesburg, South Africa.

<sup>4</sup>Empilweni Services and Research Unit, Rahima Moosa Mother and Child Hospital, Department of Paediatrics and Child Health, Faculty of Health Sciences, University of the Witwatersrand, Johannesburg, South Africa.

<sup>5</sup>Department of Biostatistics and Epidemiology, Rutgers School of Public Health, Piscataway, NJ.

<sup>6</sup>Wits Reproductive Health and HIV Institute (WRHI), Faculty of Health Sciences, University of the Witwatersrand, Johannesburg, South Africa.

<sup>7</sup>ICAP at Columbia University, Mailman School of Public Health, Columbia University Irving Medical Center, New York, NY, USA.

<sup>8</sup>Department of Pediatrics, Vagelos College of Physicians and Surgeons, Columbia University Irving Medical Center, New York, NY, USA.

**Sequences of primers and probes in the assay:**

Sequences of primers and probes were as follows, *integrase-1*: first-round conventional PCR, forward primer 5'-TGG CAG TRT TCA TTC ACA ATT TTA-3', reverse primer 5'-ACT ACT GCY CCT TCA CCT TTC CA-3'; second-round qPCR, forward primer 5'-CGG GTT TAT TAC AGR GAC AGC AGA G-3', reverse primer 5'-ACT ACT GCY CCT TCA CCT TTC CA-3', probe 5'-6FAM-TTG GCT GGT CCT TTC CA-MGB-3'; *integrase-2*: first-round conventional PCR, forward primer 5'-AAA GGT GAA GGR GCA GTA GTA ATA CAA-3', reverse primer 5'-TCA TCC TGT CTA CYT GCC ACA CAA-3'; second-round qPCR, forward primer 5'-AAA GGT GAA GGR GCA GTA GTA ATA CAA-3', reverse primer 5'-TCC TGT CYA CYT GCC ACA CAA TCA-3', probe 5'-6FAM-TGC CAT CTG TTT TCC ATA-MGB-3'.

Supplementary Figure 1: Distribution of the cycle threshold (Ct) values from the diagnostic HIV-1 PCR tests pre-ART and at 24 and 48 weeks post-ART initiation (Panel A) and pre-ART and post-ART time points stratified by viral load below or above 50 copies/ml of plasma (Panel B).

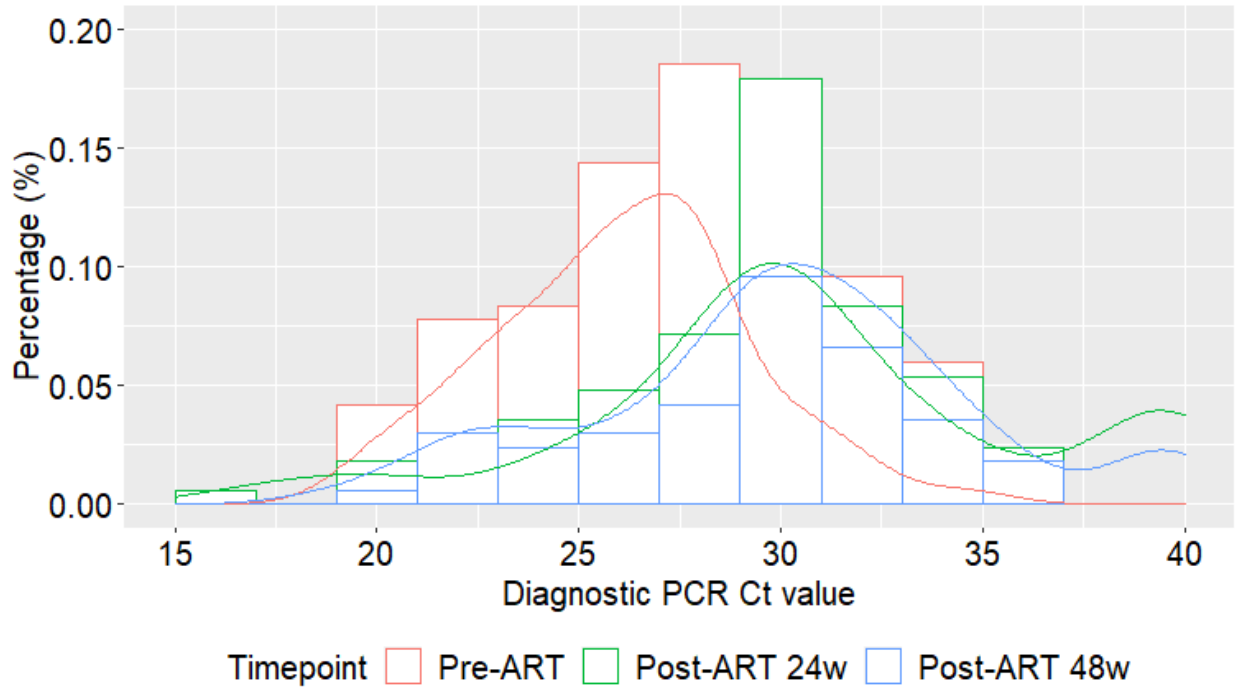

|                     | Pre-ART           | 24 weeks          | 48 weeks          |
|---------------------|-------------------|-------------------|-------------------|
| N                   | 63                | 41                | 63                |
| PCR Ct Median (IQR) | 26.1 (23.7, 28.0) | 30.2 (28.1, 33.6) | 30.1 (27.7, 32.5) |
| Mean (std)          | 26.1 (3.2)        | 30.6 (5.5)        | 30.0 (4.7)        |
| Min, Max            | 19.5 , 34.6       | 17.0 , 39.5       | 19.1 , 39.5       |
| # negative PCR      | 0/63              | 7/41              | 4/63              |

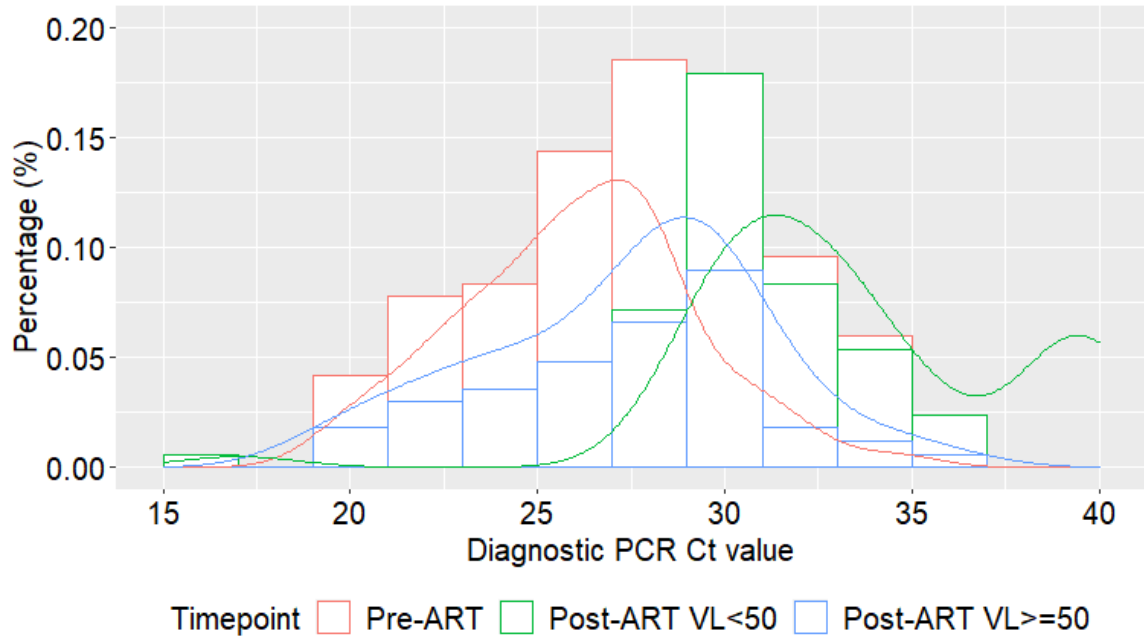

|                     | Pre-ART           | Post-ART vl<50    | Post-ART vl≥50    |
|---------------------|-------------------|-------------------|-------------------|
| N                   | 63                | 50                | 54                |
| PCR Ct Median (IQR) | 26.1 (23.7, 28.0) | 32.5 (30.5, 35.7) | 28.1 (24.5, 29.8) |
| Mean (std)          | 26.1 (3.2)        | 33.4 (4.4)        | 27.4 (3.8)        |
| Min, Max            | 19.5 , 34.6       | 17.0 , 39.5       | 19.1 , 36.0       |
| # negative PCR      | 0/63              | 11/50             | 0/54              |

**Supplementary Figure 2: Association between maternal levels of HIV-1 total DNA / 10<sup>6</sup> PBMC equivalents and concurrent HIV-1 RNA copies/ml plasma (Panel A) and CD4+ T cells /mm<sup>3</sup> (Panel B) among 62 mothers of the infants included in this analysis**

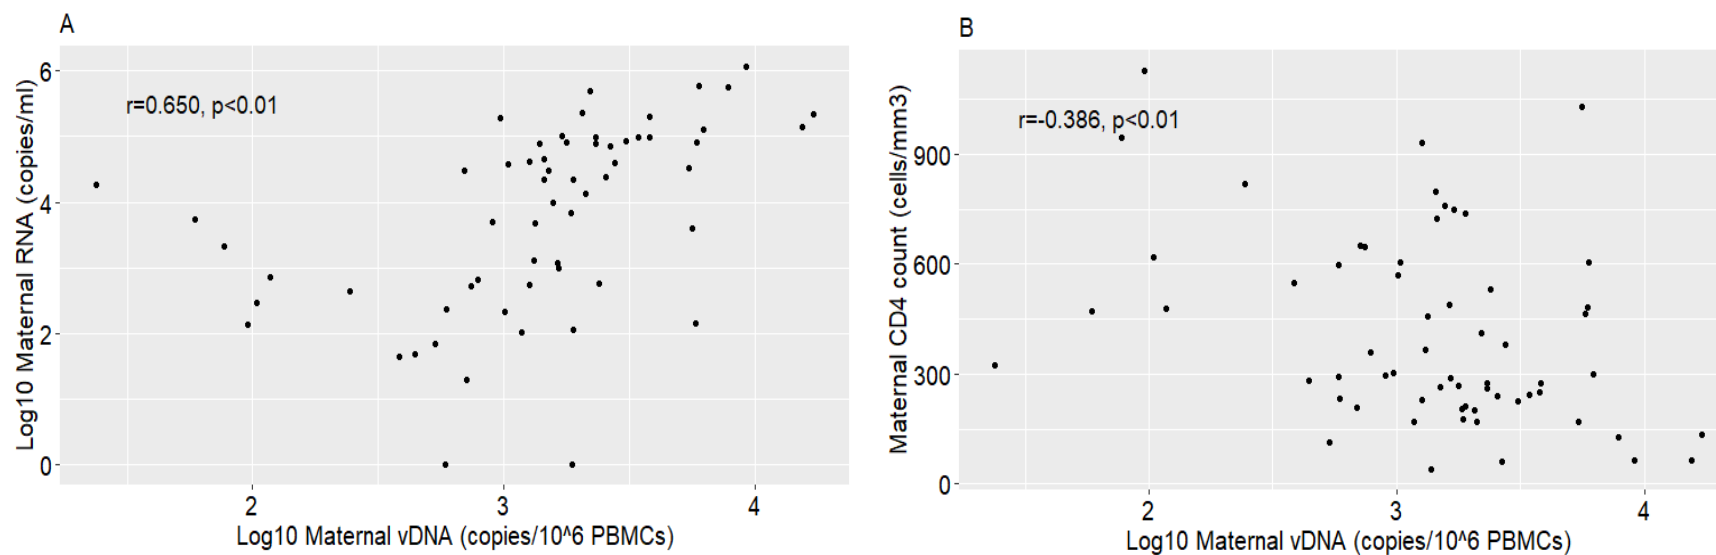

C: Univariate linear regression predicting maternal HIV-1 DNA (log copies/10<sup>6</sup> cells) among 62 mothers by baseline characteristics

|                                                                                    | Univariate linear regression predicting maternal HIV-1 DNA (log copies/10 <sup>6</sup> cells) |                         |                   |
|------------------------------------------------------------------------------------|-----------------------------------------------------------------------------------------------|-------------------------|-------------------|
|                                                                                    | Coefficient                                                                                   | 95% Confidence Interval | P-value           |
| Mother had no ART prior to delivery (ref: Had ART)                                 | -0.188                                                                                        | -0.516, 0.140           | 0.256             |
| Maternal VL (per log10 copies/ml)                                                  | 0.180                                                                                         | 0.093, 0.266            | <b>&lt;0.0001</b> |
| Maternal CD4 count ≤ 350 cells/mm <sup>3</sup> (ref: > 350 cells/mm <sup>3</sup> ) | 0.311                                                                                         | 0.032, 0.591            | <b>0.030</b>      |
| Maternal CD4 count cells (per 100 cells/mm <sup>3</sup> )                          | -0.080                                                                                        | -0.131, -0.029          | <b>0.003</b>      |

Supplementary Table 1: Multivariable associations between maternal and infant characteristics and infant HIV-1 DNA in the first 48 weeks of antiretroviral therapy among the subset of infant with plasma RNA viral load below 50 copies/ml (30 infants; 43 measurements)

|                                                    | Generalized estimating equation (GEE) analysis predicting post-ART vDNA in log copies/10 <sup>6</sup> PBMC equivalents |                         |                   |
|----------------------------------------------------|------------------------------------------------------------------------------------------------------------------------|-------------------------|-------------------|
|                                                    | Parameter co-efficient                                                                                                 | 95% Confidence Interval | P-value           |
| <b>Maternal Characteristics</b>                    |                                                                                                                        |                         |                   |
| Mother had no ART prior to delivery (ref: Had ART) | -0.6751                                                                                                                | -1.0691, -0.2811        | <b>0.0008</b>     |
| <b>Infant Characteristics</b>                      |                                                                                                                        |                         |                   |
| Start ART < 48 hours after birth (ref: >14 days)   | -0.2868                                                                                                                | -0.6968, 0.1233         | <b>0.1705</b>     |
| Start ART 49 hours to 14 days (ref >14 days)       | -0.3768                                                                                                                | -0.7624, 0.0089         | <b>0.0555</b>     |
| <b>Pre-ART infant disease severity markers</b>     |                                                                                                                        |                         |                   |
| Infant Pre-ART CD4 percent                         | -0.0503                                                                                                                | -0.0654, -0.0352        | <b>&lt;0.0001</b> |
| <b>Post-natal</b>                                  |                                                                                                                        |                         |                   |
| Ever BF (ref: never BF)                            | -0.6045                                                                                                                | -0.9613, -0.2477        | <b>0.0009</b>     |

Tabular data pertaining to Figure 1: Box plot of maternal HIV-1 DNA levels and infant HIV-1 DNA levels by time in weeks from initiation of antiretroviral therapy.

|                                                                     | Pre-ART*   | 0-18 weeks | 19-35weeks | 36 weeks52 weeks | Maternal DNA |
|---------------------------------------------------------------------|------------|------------|------------|------------------|--------------|
| Number of samples                                                   | 13         | 60         | 36         | 37               | 62           |
| Log <sub>10</sub> vDNA copies/10 <sup>6</sup> PBMC equivalents      |            |            |            |                  |              |
| Median                                                              | 3.21       | 2.62       | 2.40       | 2.36             | 3.20         |
| IQR (Q1 , Q3)                                                       | 2.67, 3.76 | 1.58, 3.13 | 1.44, 2.73 | 1.70, 2.95       | 2.87, 3.42   |
| Min , Max                                                           | 0 , 4.04   | 0 , 4.55   | 0 , 4.13   | 0 , 4.61         | 1.38 , 4.23  |
| vDNA copies/10 <sup>6</sup> PBMC equivalents in categories<br>N (%) |            |            |            |                  |              |
| Undetectable                                                        | 1 (7.7)    | 6 (10.0)   | 3 (8.3)    | 5 (13.5)         | 0            |
| 1-10                                                                | 0          | 3 (5.0)    | 1 (2.8)    | 1 (2.7)          | 0            |
| 11-100                                                              | 0          | 10 (16.7)  | 7 (19.4)   | 7 (18.9)         | 4 (6.5)      |
| 101-400                                                             | 2 (15.4)   | 10 (16.7)  | 12 (33.3)  | 10 (27.0)        | 4 (6.5)      |
| 401-1000                                                            | 2 (15.4)   | 9 (15.0)   | 8 (22.2)   | 6 (16.2)         | 11 (17.7)    |
| >1000                                                               | 8 (61.5)   | 22 (36.7)  | 5 (13.9)   | 8 (21.6)         | 43 (69.4)    |

\*Pre-treatment samples were collected from 7 infants on day 1, 3 infants on day 2 of life and one infant at each of day 6, 22 and 60.

Tabular data pertaining to Figure 2: Cross-tabulation between infant cell-associated HIV-1 DNA and infant HIV-1 RNA in plasma (viral load) in categories over the first 48 weeks of antiretroviral therapy.

|                                                    | Viral load HIV-1 RNA copies/ml plasma |                  |           |             |           |           |
|----------------------------------------------------|---------------------------------------|------------------|-----------|-------------|-----------|-----------|
|                                                    | Target Not Detected                   | Detected but <50 | 50-1000   | 1001-10,000 | >10,000   | Total     |
| <b>vDNA copies/10<sup>6</sup> PBMC equivalents</b> | <b>N (column percentage)</b>          |                  |           |             |           |           |
| Undetectable                                       | 6 (23.1)                              | 3 (17.7)         | 5 (10.6)  | 0           | 0         | 14 (10.6) |
| 1-10                                               | 3 (11.5)                              | 0                | 1 (2.1)   | 1 (6.7)     | 0         | 5 (3.8)   |
| 11-100                                             | 7 (26.9)                              | 6 (35.3)         | 9 (19.2)  | 1 (6.7)     | 0         | 23 (17.4) |
| 101-400                                            | 7 (26.9)                              | 4 (23.5)         | 14 (29.8) | 5 (33.3)    | 3 (7.4)   | 32 (24.2) |
| 401-1000                                           | 3 (11.5)                              | 3 (17.7)         | 12 (25.5) | 1 (6.7)     | 4 (14.8)  | 23 (17.4) |
| >1000                                              | 0                                     | 1 (5.9)          | 6 (12.8)  | 7 (46.7)    | 21 (77.8) | 35 (26.5) |
| Total                                              | 26 (19.7)                             | 17 (12.9)        | 47 (35.6) | 15 (11.4)   | 27 (20.5) | 132       |
